# Supplementary material for: Pain and Suffering Have Distinct Effects on Distress and Wellbeing:Evidence From a Longitudinal Multi-Country Analysis
Source: Research Square preprint supplement (doi:10.21203/rs.3.rs-7933890/v1), 2025-11-14
Supplement: Supplementary file 1 [file 81fd193a95415c4defd657f9.docx]

**Supplemental materials**

**for**

**Pain and Suffering Have Distinct Effects on Distress and Wellbeing:**

**Evidence From a Longitudinal Multi-Country Analysis**

**This document contains the following:**

**Table S.1:** Flourishing items in year 2 as a function of Pain-suffering in year 1, controlling only for the relevant dependent variable. The Global Flourishing Study (N = 20,944).

**Table S.2:** Distress-related items in year 2 as a function of Pain-suffering in year 1, controlling only for the relevant dependent variable. The Global Flourishing Study (N = 20,944).

**Table S.3:** Flourishing items in year 2 as a function of Pain-suffering in year 1, controlling for all the flourishing and distress-related items at the same time. The Global Flourishing Study (N = 20,944).

**Table S.4:** Distress-related items in year 2 as a function of Pain-suffering in year 1, controlling for all the flourishing and distress-related items at the same time. The Global Flourishing Study (N = 20,944).

**Table S.5:** Distribution of the pain-suffering variable across countries.

**Table S.6:** Continuous Variables by Pain Category and Retention Status. * *p* < 0.05, ** *p* < 0.01, *** *p* < 0.001.

**Table S.7:** Categorical Variables by Pain Category and Retention Status. * *p* < 0.05, ** *p* < 0.01, *** *p* < 0.001.

**Table S.1:** Flourishing items in year 2 as a function of Pain-suffering in year 1, controlling only for the relevant dependent variable. The Global Flourishing Study (N = 20,944).

|  | *Dependent variables in Y2* | | | | | | | | | | | | | |
| --- | --- | --- | --- | --- | --- | --- | --- | --- | --- | --- | --- | --- | --- | --- |
|  | Flourishing | Secure Flourishing | Happiness | Life satisfaction | Mental health | Physical health | Meaning | Purpose | Relationship cont. | Relationship sat. | Orien. promote good | Delayed gratif. | Financial security | Material security |
|  | (1) | (2) | (3) | (4) | (5) | (6) | (7) | (8) | (9) | (10) | (11) | (12) | (13) | (14) |
| Pain-suffering Y1 *(Ref.: A lot of pain – No suffering)* | | |  |  |  |  |  |  |  |  |  |  |  |
| No pain – No suffering | 0.144* | 0.152* | 0.454** | 0.470** | 0.276** | 0.544*** | 0.427*** | 0.111 | 0.245 | 0.162 | 0.256 | 0.194 | 0.508** | 0.533** |
|  | (0.067) | (0.062) | (0.143) | (0.133) | (0.096) | (0.098) | (0.109) | (0.106) | (0.143) | (0.115) | (0.125) | (0.132) | (0.162) | (0.188) |
| **No pain – A lot of suffering** | **-0.245**** | **-0.201**** | **-0.455*** | **-0.507**** | **-0.479***** | **-0.030** | **-0.448*** | **-0.551***** | **-0.471*** | **-0.564**** | **-0.202** | **-0.147** | **-0.138** | **-0.369*** |
|  | **(0.071)** | **(0.069)** | **(0.186)** | **(0.163)** | **(0.122)** | **(0.110)** | **(0.185)** | **(0.114)** | **(0.196)** | **(0.165)** | **(0.115)** | **(0.165)** | **(0.197)** | **(0.176)** |
| A lot of pain – A lot of suffering | -0.503*** | -0.485*** | -0.906*** | -0.955*** | -0.887*** | -0.939*** | -0.731*** | -0.849*** | -0.705*** | -0.938*** | -0.282** | -0.459** | -0.966*** | -0.914*** |
|  | (0.088) | (0.086) | (0.149) | (0.130) | (0.143) | (0.121) | (0.129) | (0.117) | (0.177) | (0.164) | (0.096) | (0.142) | (0.185) | (0.165) |
| Flourishing Y1 | 0.559*** | - | - | - | - | - | - | - | - | - | - | - | - | - |
|  | (0.054) |  |  |  |  |  |  |  |  |  |  |  |  |  |
| Secure FlourishingY1 | - | 0.576*** | - | - | - | - | - | - | - | - | - | - | - | - |
|  |  | (0.051) |  |  |  |  |  |  |  |  |  |  |  |  |
| Happiness Y1 | - | - | 0.349*** | - | - | - | - | - | - | - | - | - | - | - |
|  |  |  | (0.055) |  |  |  |  |  |  |  |  |  |  |  |
| Life satisfaction Y1 | - | - | - | 0.365*** | - | - | - | - | - | - | - | - | - | - |
|  |  |  |  | (0.044) |  |  |  |  |  |  |  |  |  |  |
| Mental health Y1 | - | - | - | - | 0.434*** | - | - | - | - | - | - | - | - | - |
|  |  |  |  |  | (0.066) |  |  |  |  |  |  |  |  |  |
| Physical health Y1 | - | - | - | - | - | 0.412*** | - | - | - | - | - | - | - | - |
|  |  |  |  |  |  | (0.063) |  |  |  |  |  |  |  |  |
| Meaning Y1 | - | - | - | - | - | - | 0.355*** | - | - | - | - | - | - | - |
|  |  |  |  |  |  |  | (0.057) |  |  |  |  |  |  |  |
| Purpose Y1 | - | - | - | - | - | - | - | 0.404*** | - | - | - | - | - | - |
|  |  |  |  |  |  |  |  | (0.067) |  |  |  |  |  |  |
| Relationship contentment Y1 | - | - | - | - | - | - | - | - | 0.383*** | - | - | - | - | - |
|  |  |  |  |  |  |  |  |  | (0.058) |  |  |  |  |  |
| Relationship satisfaction Y1 | - | - | - | - | - | - | - | - | - | 0.368*** | - | - | - | - |
|  |  |  |  |  |  |  |  |  |  | (0.054) |  |  |  |  |
| Orientation to promote good Y1 | - | - | - | - | - | - | - | - | - | - | 0.336*** | - | - | - |
|  |  |  |  |  |  |  |  |  |  |  | (0.060) |  |  |  |
| Delayed gratification Y1 | - | - | - | - | - | - | - | - | - | - | - | 0.251*** | - | - |
|  |  |  |  |  |  |  |  |  |  |  |  | (0.045) |  |  |
| Financial security Y1 | - | - | - | - | - | - | - | - | - | - | - | - | 0.363*** | - |
|  |  |  |  |  |  |  |  |  |  |  |  |  | (0.053) |  |
| Material security Y1 | - | - | - | - | - | - | - | - | - | - | - | - | - | 0.340*** |
|  |  |  |  |  |  |  |  |  |  |  |  |  |  | (0.041) |
| Age Y1 | -0.001 | 0.000 | -0.001 | -0.001 | 0.003 | -0.007 | -0.000 | 0.002 | 0.002 | 0.003 | 0.000 | -0.006 | 0.010* | 0.010* |
|  | (0.002) | (0.002) | (0.004) | (0.003) | (0.003) | (0.004) | (0.003) | (0.003) | (0.003) | (0.002) | (0.003) | (0.003) | (0.004) | (0.004) |
| Gender *(Ref.: Male)* | |  |  |  |  |  |  |  |  |  |  |  |  |  |
|  |  |  |  |  |  |  |  |  |  |  |  |  |  |  |
| Female | 0.026 | 0.024 | 0.085* | 0.084 | -0.018 | -0.030 | 0.116** | 0.026 | 0.053 | 0.071* | 0.017 | 0.070 | -0.026 | -0.011 |
|  | (0.021) | (0.022) | (0.037) | (0.041) | (0.029) | (0.046) | (0.041) | (0.030) | (0.037) | (0.031) | (0.039) | (0.066) | (0.058) | (0.048) |
| Other | -0.335 | -0.302 | -0.329 | -0.598 | -0.649 | -0.977 | -0.694* | -0.560* | -0.112 | 0.239 | -0.471 | -0.013 | -0.570 | -0.138 |
|  | (0.191) | (0.175) | (0.285) | (0.307) | (0.409) | (0.602) | (0.293) | (0.261) | (0.385) | (0.407) | (0.324) | (0.332) | (0.387) | (0.325) |
| Marital status Y1 *(Ref.: Married)* | |  |  |  |  |  |  |  |  |  |  |  |  |  |
| Separated | -0.146 | -0.142* | -0.346** | -0.170* | -0.080 | -0.085 | -0.264** | -0.264* | -0.456** | -0.533*** | -0.006 | -0.074 | -0.110 | -0.433* |
|  | (0.075) | (0.061) | (0.111) | (0.081) | (0.098) | (0.123) | (0.079) | (0.122) | (0.124) | (0.104) | (0.107) | (0.120) | (0.133) | (0.188) |
| Divorced | -0.116** | -0.138** | -0.328*** | -0.279*** | -0.102 | -0.135* | -0.252** | -0.123* | -0.255** | -0.390*** | 0.016 | -0.067 | -0.427*** | -0.419*** |
|  | (0.033) | (0.037) | (0.071) | (0.053) | (0.056) | (0.055) | (0.072) | (0.056) | (0.072) | (0.072) | (0.049) | (0.061) | (0.085) | (0.081) |
| Widowed | 0.026 | 0.025 | -0.035 | 0.031 | -0.008 | -0.037 | -0.079 | 0.057 | 0.020 | -0.043 | -0.022 | 0.018 | -0.017 | -0.043 |
|  | (0.036) | (0.037) | (0.062) | (0.090) | (0.083) | (0.075) | (0.074) | (0.046) | (0.085) | (0.100) | (0.072) | (0.106) | (0.114) | (0.102) |
| Single | -0.184*** | -0.158*** | -0.268*** | -0.294*** | -0.202*** | -0.131* | -0.304*** | -0.289*** | -0.316*** | -0.334*** | -0.194*** | -0.241*** | -0.133* | -0.104 |
|  | (0.037) | (0.036) | (0.068) | (0.064) | (0.051) | (0.047) | (0.060) | (0.057) | (0.074) | (0.070) | (0.041) | (0.043) | (0.062) | (0.062) |
| Domestic partner | -0.108** | -0.102* | -0.145* | -0.168** | -0.123* | -0.140* | -0.100 | -0.296*** | -0.119* | -0.171 | -0.109 | -0.084 | -0.115 | -0.217 |
|  | (0.036) | (0.036) | (0.056) | (0.054) | (0.050) | (0.061) | (0.063) | (0.075) | (0.057) | (0.089) | (0.064) | (0.077) | (0.099) | (0.116) |
| Employment status Y1 *(Ref.: Employed for an employer)* | |  |  |  |  |  |  |  |  |  |  |  |  |  |
| Self-employed | 0.046 | 0.035 | 0.085 | 0.052 | 0.068 | 0.098 | 0.038 | -0.010 | 0.010 | -0.020 | 0.077 | 0.085 | -0.026 | -0.023 |
|  | (0.037) | (0.036) | (0.071) | (0.064) | (0.046) | (0.055) | (0.062) | (0.053) | (0.044) | (0.049) | (0.081) | (0.055) | (0.066) | (0.061) |
| Retired | 0.114 | 0.123 | 0.231* | 0.274** | 0.105 | -0.012 | 0.179* | 0.121 | 0.219** | 0.198** | 0.089 | 0.124 | 0.342* | 0.279** |
|  | (0.058) | (0.060) | (0.101) | (0.087) | (0.097) | (0.074) | (0.085) | (0.075) | (0.062) | (0.060) | (0.073) | (0.085) | (0.129) | (0.096) |
| Student | 0.156* | 0.142 | 0.324** | 0.294* | 0.171 | 0.016 | 0.076 | 0.170 | 0.236* | 0.275* | 0.171** | 0.276** | 0.200 | 0.235 |
|  | (0.069) | (0.075) | (0.111) | (0.135) | (0.120) | (0.089) | (0.097) | (0.106) | (0.090) | (0.104) | (0.055) | (0.096) | (0.154) | (0.169) |
| Homemaker | -0.007 | -0.002 | 0.131 | 0.065 | 0.048 | -0.150 | -0.022 | -0.128 | -0.009 | 0.064 | -0.003 | 0.057 | 0.001 | 0.063 |
|  | (0.038) | (0.033) | (0.087) | (0.086) | (0.077) | (0.072) | (0.054) | (0.071) | (0.056) | (0.062) | (0.062) | (0.112) | (0.089) | (0.067) |
| Unemployed and looking for a job | -0.063 | -0.074 | -0.180* | -0.244** | -0.008 | -0.099 | -0.123* | -0.159* | -0.044 | -0.164* | -0.119 | -0.055 | -0.312** | -0.355*** |
|  | (0.038) | (0.039) | (0.082) | (0.069) | (0.062) | (0.068) | (0.055) | (0.072) | (0.085) | (0.062) | (0.090) | (0.048) | (0.106) | (0.078) |
| None of these/other | -0.146 | -0.150 | -0.101 | -0.114 | -0.283* | -0.375** | -0.208 | -0.350** | -0.211 | -0.162 | -0.161* | -0.177* | -0.341 | -0.260 |
|  | (0.072) | (0.084) | (0.092) | (0.154) | (0.118) | (0.116) | (0.130) | (0.106) | (0.106) | (0.083) | (0.064) | (0.074) | (0.222) | (0.200) |
| Level of education *(Ref.: Primary)* | |  |  |  |  |  |  |  |  |  |  |  |  |  |
| Secondary | 0.104* | 0.089 | 0.036 | 0.049 | 0.184* | 0.172* | 0.050 | 0.164 | 0.139 | 0.067 | 0.239** | 0.122 | 0.029 | 0.056 |
|  | (0.050) | (0.049) | (0.093) | (0.086) | (0.087) | (0.078) | (0.069) | (0.095) | (0.068) | (0.052) | (0.081) | (0.082) | (0.079) | (0.075) |
| Tertiary | 0.222** | 0.236** | 0.248 | 0.221* | 0.260* | 0.324* | 0.246* | 0.322* | 0.203* | 0.182* | 0.324** | 0.313** | 0.499*** | 0.400** |
|  | (0.066) | (0.065) | (0.144) | (0.104) | (0.097) | (0.116) | (0.093) | (0.117) | (0.081) | (0.077) | (0.092) | (0.088) | (0.114) | (0.116) |
| Number of children Y1 | -0.013 | -0.014 | -0.025 | -0.010 | -0.008 | -0.009 | -0.006 | 0.007 | -0.024 | -0.023 | -0.026 | -0.012 | -0.032 | -0.024 |
|  | (0.009) | (0.008) | (0.015) | (0.014) | (0.009) | (0.009) | (0.011) | (0.012) | (0.018) | (0.015) | (0.016) | (0.011) | (0.018) | (0.017) |
| Constant | 3.500*** | 3.058*** | 4.691*** | 4.568*** | 4.373*** | 4.357*** | 5.196*** | 4.844*** | 5.114*** | 5.039*** | 5.631*** | 6.051*** | 2.325*** | 2.365*** |
|  | (0.492) | (0.450) | (0.467) | (0.373) | (0.606) | (0.568) | (0.523) | (0.642) | (0.558) | (0.483) | (0.599) | (0.474) | (0.403) | (0.330) |
| *N* | 20,944 | 20,944 | 20,944 | 20,944 | 20,944 | 20,944 | 20,944 | 20,944 | 20,944 | 20,944 | 20,944 | 20,944 | 20,944 | 20,944 |
| adj. *R*2 | 0.509 | 0.538 | 0.316 | 0.341 | 0.386 | 0.435 | 0.294 | 0.300 | 0.258 | 0.260 | 0.203 | 0.159 | 0.357 | 0.343 |
| *Note:* * *p* < 0.05, ** *p* < 0.01, *** *p* < 0.001. Table shows unstandardized coefficients from Ordinary Least Squares Regressions with standard errors clustered at the country level in parentheses. | | | | | | | | | | | | | | |

**Table S.2:** Distress-related items in year 2 as a function of Pain-suffering in year 1, controlling only for the relevant dependent variable. The Global Flourishing Study (N = 20,944).

|  | *Dependent variables in Y2* | | | | | |
| --- | --- | --- | --- | --- | --- | --- |
|  | Threat life | Depression symptoms | Anxiety symptoms | Loneliness | Perceived discrimination | Health problems |
|  | (1) | (2) | (3) | (4) | (5) | (6) |
| Pain-suffering Y1 *(Ref.: A lot of pain No suffering)* | |  |  |  |  |
| No pain – No suffering | -0.268*** | -0.236*** | -0.199*** | -0.567*** | -0.118*** | -0.126*** |
|  | (0.065) | (0.058) | (0.049) | (0.127) | (0.030) | (0.024) |
| **No pain – A lot of suffering** | **0.087** | **0.121** | **0.146** | **0.601**** | **0.037** | **-0.022** |
|  | **(0.080)** | **(0.069)** | **(0.075)** | **(0.178)** | **(0.040)** | **(0.029)** |
| A lot of pain – A lot of suffering | 0.385*** | 0.327*** | 0.329*** | 1.087*** | 0.160*** | 0.165*** |
|  | (0.074) | (0.066) | (0.063) | (0.159) | (0.032) | (0.022) |
| Threat life Y1 | 0.225*** | - | - | - | - | - |
|  | (0.027) |  |  |  |  |  |
| Depression symptoms Y1 | - | 0.321*** | - | - | - | - |
|  |  | (0.050) |  |  |  |  |
| Anxiety symptoms Y1 | - | - | 0.323*** | - | - | - |
|  |  |  | (0.045) |  |  |  |
| Loneliness Y1 | - | - | - | 0.315*** | - | - |
|  |  |  |  | (0.047) |  |  |
| Perceived discrimination Y1 | - | - | - | - | 0.281*** | - |
|  |  |  |  |  | (0.051) |  |
| Health problems Y1 | - | - | - | - | - | 0.378*** |
|  |  |  |  |  |  | (0.054) |
| Age Y1 | -0.000 | -0.003** | -0.004*** | -0.007 | -0.002*** | 0.001* |
|  | (0.001) | (0.001) | (0.001) | (0.004) | (0.001) | (0.000) |
| Gender *(Ref.: Male)* |  |  |  |  |  |  |
| Female | 0.081*** | 0.037* | 0.062** | -0.137** | 0.033* | -0.002 |
|  | (0.019) | (0.017) | (0.017) | (0.048) | (0.013) | (0.007) |
| Other | 0.129 | -0.025 | 0.356 | -0.333 | 0.584*** | 0.009 |
|  | (0.131) | (0.136) | (0.201) | (0.230) | (0.087) | (0.052) |
| Marital status Y1 *(Ref.: Married)* |  |  |  |  |  |  |
| Separated | 0.151* | 0.070 | 0.083 | 0.873*** | 0.049 | 0.034* |
|  | (0.058) | (0.039) | (0.044) | (0.143) | (0.039) | (0.016) |
| Divorced | 0.054* | 0.064** | 0.043 | 0.536*** | 0.035 | 0.031** |
|  | (0.024) | (0.021) | (0.029) | (0.121) | (0.019) | (0.010) |
| Widowed | -0.003 | 0.056 | 0.011 | 0.580*** | -0.067* | 0.015 |
|  | (0.034) | (0.029) | (0.030) | (0.092) | (0.026) | (0.012) |
| Single | 0.002 | 0.041 | 0.052* | 0.486*** | 0.003 | 0.011 |
|  | (0.019) | (0.022) | (0.021) | (0.055) | (0.020) | (0.008) |
| Domestic partner | 0.000 | 0.042 | 0.053 | 0.116 | 0.006 | 0.007 |
|  | (0.033) | (0.028) | (0.026) | (0.080) | (0.026) | (0.010) |
| Employment status Y1 *(Ref.: Employed for an employer)* |  |  |  |  |  |  |
| Self-employed | -0.020 | 0.012 | 0.004 | -0.062 | 0.002 | 0.029*** |
|  | (0.027) | (0.014) | (0.019) | (0.071) | (0.025) | (0.007) |
| Retired | 0.013 | 0.003 | -0.038 | -0.298** | -0.022 | 0.056*** |
|  | (0.026) | (0.022) | (0.030) | (0.104) | (0.027) | (0.010) |
| Student | -0.049 | -0.050 | -0.044 | -0.150 | 0.009 | 0.030* |
|  | (0.044) | (0.036) | (0.037) | (0.121) | (0.031) | (0.012) |
| Homemaker | 0.022 | 0.066** | 0.048* | 0.006 | -0.009 | 0.037*** |
|  | (0.025) | (0.021) | (0.023) | (0.072) | (0.019) | (0.009) |
| Unemployed and looking | 0.062* | 0.156*** | 0.119*** | 0.201* | 0.090*** | 0.042** |
|  | (0.030) | (0.027) | (0.027) | (0.096) | (0.022) | (0.013) |
| Other/None | 0.047 | 0.069 | 0.070* | 0.236* | 0.024 | 0.102** |
|  | (0.052) | (0.043) | (0.032) | (0.084) | (0.030) | (0.029) |
| Level of education *(Ref.: Primary)* |  |  |  |  |  |  |
| Secondary | -0.033 | -0.023 | -0.050 | -0.235** | -0.008 | -0.011 |
|  | (0.030) | (0.020) | (0.036) | (0.075) | (0.026) | (0.012) |
| Tertiary | -0.099 | -0.079** | -0.106* | -0.380** | -0.031 | -0.029* |
|  | (0.048) | (0.027) | (0.041) | (0.110) | (0.029) | (0.011) |
| Number of children Y1 | 0.005 | -0.003 | 0.004 | 0.029 | 0.001 | -0.003 |
|  | (0.005) | (0.006) | (0.004) | (0.016) | (0.004) | (0.001) |
| Constant | 1.596*** | 1.394*** | 1.530*** | 2.520*** | 1.410*** | 0.092** |
|  | (0.108) | (0.133) | (0.101) | (0.266) | (0.109) | (0.029) |
| *N* | 20944 | 20944 | 20944 | 20944 | 20944 | 20944 |
| adj. *R*2 | 0.276 | 0.357 | 0.341 | 0.295 | 0.188 | 0.415 |
| *Note:* * *p* < 0.05, ** *p* < 0.01, *** *p* < 0.001. Table shows unstandardized coefficients from Ordinary Least Squares Regressions with standard errors clustered at the country level in parentheses. | | | | | | |

**Table S.3:** Flourishing items in year 2 as a function of Pain-suffering in year 1, controlling for all the flourishing and distress-related items at the same time. The Global Flourishing Study (N = 20,944).

|  | *Dependent variables in Y2* | | | | | | | | | | | | | |
| --- | --- | --- | --- | --- | --- | --- | --- | --- | --- | --- | --- | --- | --- | --- |
|  | Flourishing | Secure Flourishing | Happiness | Life satisfaction | Mental health | Physical health | Meaning | Purpose | Relationship cont. | Relationship sat. | Orien. promote good | Delayed gratif. | Financial security | Material security |
|  | (1) | (2) | (3) | (4) | (5) | (6) | (7) | (8) | (9) | (10) | (11) | (12) | (13) | (14) |
| Pain-suffering Y1 *(Ref.: A lot of pain – No suffering)* | |  |  |  |  |  |  |  |  |  |  |  |  |  |
| No pain – No suffering | 0.010 | 0.010 | 0.063 | 0.111 | -0.087 | 0.505*** | 0.026 | -0.167 | -0.163 | -0.219* | 0.041 | -0.009 | 0.022 | -0.001 |
|  | (0.059) | (0.056) | (0.105) | (0.115) | (0.098) | (0.114) | (0.086) | (0.083) | (0.121) | (0.092) | (0.088) | (0.118) | (0.137) | (0.168) |
| **No pain – A lot of suffering** | **-0.187*** | **-0.171*** | **-0.275** | **-0.402**** | **-0.385**** | **0.368***** | **-0.263** | **-0.293*** | **-0.315*** | **-0.346*** | **-0.019** | **0.057** | **0.034** | **-0.206** |
|  | **(0.071)** | **(0.062)** | **(0.134)** | **(0.106)** | **(0.109)** | **(0.095)** | **(0.143)** | **(0.111)** | **(0.134)** | **(0.134)** | **(0.084)** | **(0.138)** | **(0.214)** | **(0.208)** |
| A lot of pain – A lot of suffering | -0.282** | -0.285** | -0.294* | -0.462*** | -0.514*** | -0.735*** | -0.146 | -0.234 | -0.158 | -0.399* | 0.176 | -0.055 | -0.324 | -0.279 |
|  | (0.080) | (0.083) | (0.119) | (0.110) | (0.125) | (0.128) | (0.089) | (0.123) | (0.155) | (0.181) | (0.097) | (0.125) | (0.163) | (0.185) |
| Secure flourishing Y1 | 0.525*** | 0.527*** | 0.539*** | 0.599*** | 0.480*** | 0.468*** | 0.596*** | 0.593*** | 0.543*** | 0.552*** | 0.435*** | 0.441*** | 0.555*** | 0.526*** |
|  | (0.050) | (0.051) | (0.048) | (0.046) | (0.050) | (0.037) | (0.060) | (0.081) | (0.055) | (0.062) | (0.054) | (0.037) | (0.071) | (0.053) |
| Threat life Y1 | 0.002 | -0.021 | -0.048* | -0.033 | -0.041* | 0.002 | 0.004 | 0.045 | 0.042 | -0.004 | 0.012 | 0.036* | -0.142*** | -0.125** |
|  | (0.011) | (0.011) | (0.019) | (0.019) | (0.016) | (0.017) | (0.024) | (0.027) | (0.027) | (0.024) | (0.025) | (0.015) | (0.033) | (0.034) |
| Depression symptoms Y1 | -0.075*** | -0.065*** | -0.146*** | -0.150*** | -0.177*** | 0.036 | -0.122*** | -0.064* | -0.112*** | -0.090* | 0.033 | 0.045 | 0.013 | -0.044 |
|  | (0.011) | (0.012) | (0.026) | (0.023) | (0.047) | (0.041) | (0.027) | (0.027) | (0.029) | (0.043) | (0.028) | (0.032) | (0.060) | (0.042) |
| Anxiety symptoms Y1 | -0.048 | -0.070* | -0.109* | -0.069 | -0.174*** | -0.038 | -0.045 | -0.045* | -0.037 | -0.017 | 0.011 | 0.047 | -0.207*** | -0.158*** |
|  | (0.030) | (0.027) | (0.045) | (0.046) | (0.043) | (0.049) | (0.042) | (0.021) | (0.047) | (0.032) | (0.032) | (0.031) | (0.044) | (0.026) |
| Loneliness Y1 | -0.019*** | -0.023*** | -0.042*** | -0.017* | -0.029*** | 0.001 | -0.011 | -0.015 | -0.046** | -0.049** | 0.000 | 0.021 | -0.037* | -0.046** |
|  | (0.005) | (0.004) | (0.006) | (0.007) | (0.007) | (0.009) | (0.006) | (0.009) | (0.015) | (0.016) | (0.006) | (0.012) | (0.015) | (0.013) |
| Perceived discrimination Y1 | -0.004 | -0.015 | 0.030 | 0.008 | 0.006 | 0.026 | 0.008 | 0.035* | -0.098*** | -0.091** | -0.021 | 0.053 | -0.065 | -0.072 |
|  | (0.014) | (0.016) | (0.029) | (0.037) | (0.028) | (0.021) | (0.033) | (0.016) | (0.025) | (0.031) | (0.035) | (0.027) | (0.034) | (0.051) |
| Health problems Y1 | -0.226*** | -0.242*** | -0.147* | -0.112 | -0.379*** | -1.172*** | -0.146* | -0.109 | -0.053 | -0.036 | -0.030 | -0.074 | -0.364*** | -0.281** |
|  | (0.047) | (0.048) | (0.053) | (0.091) | (0.097) | (0.154) | (0.061) | (0.079) | (0.062) | (0.077) | (0.048) | (0.056) | (0.090) | (0.094) |
| Age Y1 | -0.002 | -0.000 | -0.006* | -0.005 | 0.004 | -0.011* | -0.002 | 0.003 | -0.000 | 0.000 | -0.000 | -0.007* | 0.011* | 0.009* |
|  | (0.002) | (0.002) | (0.003) | (0.002) | (0.003) | (0.004) | (0.003) | (0.003) | (0.002) | (0.002) | (0.003) | (0.003) | (0.004) | (0.004) |
| Gender *(Ref.: Male)* | |  |  |  |  |  |  |  |  |  |  |  |  |  |
| Female | 0.060* | 0.033 | 0.127** | 0.125* | -0.061* | -0.044 | 0.169** | 0.041 | 0.085 | 0.087* | 0.035 | 0.032 | -0.118* | -0.079 |
|  | (0.024) | (0.023) | (0.041) | (0.048) | (0.027) | (0.052) | (0.045) | (0.034) | (0.041) | (0.038) | (0.039) | (0.078) | (0.053) | (0.055) |
| Other | -0.244 | -0.223 | -0.209 | -0.441* | -0.616 | -0.969 | -0.534 | -0.460* | 0.228 | 0.623 | -0.114 | 0.047 | -0.291 | 0.061 |
|  | (0.177) | (0.176) | (0.211) | (0.195) | (0.393) | (0.700) | (0.403) | (0.208) | (0.423) | (0.427) | (0.277) | (0.321) | (0.373) | (0.377) |
| Marital status Y1 *(Ref.: Married)* | |  |  |  |  |  |  |  |  |  |  |  |  |  |
| Separated | -0.108 | -0.107 | -0.214* | -0.106 | 0.060 | 0.082 | -0.151 | -0.090 | -0.419** | -0.513*** | 0.183 | 0.086 | 0.030 | -0.234 |
|  | (0.072) | (0.065) | (0.101) | (0.077) | (0.109) | (0.126) | (0.078) | (0.106) | (0.114) | (0.133) | (0.107) | (0.099) | (0.138) | (0.162) |
| Divorced | -0.078* | -0.122** | -0.213** | -0.203*** | 0.080 | 0.031 | -0.120 | -0.028 | -0.195* | -0.377*** | 0.186** | 0.061 | -0.366*** | -0.315*** |
|  | (0.031) | (0.033) | (0.075) | (0.048) | (0.065) | (0.052) | (0.059) | (0.063) | (0.081) | (0.080) | (0.054) | (0.055) | (0.084) | (0.079) |
| Widowed | 0.051 | 0.056 | 0.004 | 0.069 | 0.089 | 0.035 | -0.021 | 0.134 | 0.079 | 0.031 | 0.031 | 0.056 | 0.082 | 0.081 |
|  | (0.033) | (0.036) | (0.063) | (0.096) | (0.095) | (0.076) | (0.075) | (0.070) | (0.069) | (0.086) | (0.070) | (0.099) | (0.111) | (0.099) |
| Single | -0.181*** | -0.145*** | -0.186** | -0.211** | -0.071 | 0.010 | -0.228*** | -0.240*** | -0.275*** | -0.346*** | -0.093* | -0.171*** | 0.040 | 0.034 |
|  | (0.037) | (0.036) | (0.063) | (0.064) | (0.063) | (0.056) | (0.051) | (0.058) | (0.070) | (0.078) | (0.045) | (0.043) | (0.070) | (0.058) |
| Domestic partner | -0.090* | -0.097* | -0.089 | -0.097 | -0.080 | -0.058 | -0.039 | -0.308*** | -0.087 | -0.112 | -0.059 | 0.031 | -0.105 | -0.157 |
|  | (0.037) | (0.035) | (0.052) | (0.057) | (0.051) | (0.063) | (0.056) | (0.077) | (0.061) | (0.093) | (0.070) | (0.079) | (0.089) | (0.109) |
| Employment status Y1 *(Ref.: Employed for an employer)* | |  |  |  |  |  |  |  |  |  |  |  |  |  |
| Self-employed | 0.049 | 0.034 | 0.116 | 0.067 | 0.070 | 0.119* | 0.049 | -0.047 | 0.027 | -0.029 | 0.084 | 0.039 | -0.056 | -0.036 |
|  | (0.036) | (0.033) | (0.072) | (0.072) | (0.046) | (0.046) | (0.049) | (0.059) | (0.041) | (0.052) | (0.078) | (0.051) | (0.075) | (0.071) |
| Retired | 0.087 | 0.128* | 0.227** | 0.256*** | 0.059 | -0.050 | 0.060 | 0.025 | 0.149** | 0.126* | 0.010 | 0.013 | 0.394** | 0.267** |
|  | (0.055) | (0.057) | (0.074) | (0.067) | (0.096) | (0.083) | (0.091) | (0.072) | (0.052) | (0.053) | (0.079) | (0.090) | (0.120) | (0.092) |
| Student | 0.128 | 0.144 | 0.267* | 0.285* | 0.116 | -0.034 | 0.007 | 0.015 | 0.200 | 0.182 | 0.065 | 0.172* | 0.204 | 0.252 |
|  | (0.068) | (0.072) | (0.100) | (0.134) | (0.117) | (0.087) | (0.095) | (0.076) | (0.096) | (0.110) | (0.048) | (0.071) | (0.145) | (0.182) |
| Homemaker | 0.006 | 0.004 | 0.145* | 0.140 | 0.086 | -0.144 | -0.037 | -0.147 | -0.035 | 0.024 | -0.013 | 0.040 | -0.032 | 0.019 |
|  | (0.031) | (0.030) | (0.064) | (0.069) | (0.057) | (0.071) | (0.062) | (0.080) | (0.060) | (0.066) | (0.069) | (0.107) | (0.106) | (0.087) |
| Unemployed and looking | 0.007 | -0.052 | -0.051 | -0.208* | 0.188* | 0.099 | -0.048 | -0.041 | 0.094 | -0.042 | 0.040 | 0.039 | -0.337* | -0.358*** |
|  | (0.044) | (0.040) | (0.084) | (0.079) | (0.074) | (0.071) | (0.051) | (0.078) | (0.099) | (0.074) | (0.089) | (0.052) | (0.131) | (0.091) |
| Other/None | -0.111 | -0.127 | 0.065 | 0.042 | -0.197 | -0.275** | -0.138 | -0.325*** | -0.081 | -0.039 | -0.071 | -0.090 | -0.274 | -0.145 |
|  | (0.063) | (0.077) | (0.081) | (0.123) | (0.113) | (0.091) | (0.116) | (0.082) | (0.080) | (0.076) | (0.080) | (0.069) | (0.235) | (0.197) |
| Level of education *(Ref.: Primary)* | |  |  |  |  |  |  |  |  |  |  |  |  |  |
| Secondary | 0.097 | 0.081 | 0.016 | -0.044 | 0.178 | 0.173* | 0.046 | 0.231* | 0.053 | -0.068 | 0.274*** | 0.110 | -0.021 | 0.024 |
|  | (0.056) | (0.050) | (0.100) | (0.089) | (0.101) | (0.071) | (0.068) | (0.084) | (0.062) | (0.054) | (0.060) | (0.069) | (0.079) | (0.080) |
| Tertiary | 0.184* | 0.230** | 0.158 | 0.077 | 0.202 | 0.276* | 0.207* | 0.360** | 0.039 | -0.052 | 0.316*** | 0.255** | 0.508*** | 0.413** |
|  | (0.073) | (0.066) | (0.141) | (0.092) | (0.114) | (0.099) | (0.079) | (0.117) | (0.079) | (0.078) | (0.067) | (0.077) | (0.107) | (0.119) |
| Number of children Y1 | -0.008 | -0.013 | -0.023 | -0.007 | -0.001 | -0.001 | 0.003 | 0.019 | -0.023 | -0.021 | -0.023 | -0.008 | -0.042 | -0.036 |
|  | (0.009) | (0.009) | (0.015) | (0.013) | (0.008) | (0.010) | (0.012) | (0.014) | (0.019) | (0.014) | (0.014) | (0.010) | (0.020) | (0.020) |
| Constant | 4.474*** | 3.901*** | 4.210*** | 3.624*** | 5.281*** | 4.204*** | 4.157*** | 3.804*** | 5.059*** | 4.652*** | 5.281*** | 4.467*** | 0.975 | 1.092 |
|  | (0.470) | (0.493) | (0.429) | (0.381) | (0.399) | (0.530) | (0.513) | (0.752) | (0.496) | (0.553) | (0.569) | (0.486) | (0.792) | (0.536) |
| *N* | 20944 | 20944 | 20944 | 20944 | 20944 | 20944 | 20944 | 20944 | 20944 | 20944 | 20944 | 20944 | 20944 | 20944 |
| adj. *R*2 | 0.509 | 0.543 | 0.348 | 0.357 | 0.375 | 0.414 | 0.317 | 0.286 | 0.263 | 0.264 | 0.191 | 0.150 | 0.333 | 0.326 |
| *Note:* * *p* < 0.05, ** *p* < 0.01, *** *p* < 0.001. Table shows unstandardized coefficients from Ordinary Least Squares Regressions with standard errors clustered at the country level in parentheses. | | | | | | | | | | | | | | |

**Table S.4:** Distress-related items in year 2 as a function of Pain-suffering in year 1, controlling for all the flourishing and distress-related items at the same time. The Global Flourishing Study (N = 20,944).

|  | *Dependent variables in Y2* | | | | | |
| --- | --- | --- | --- | --- | --- | --- |
|  | Threat life | Depression symptoms | Anxiety symptoms | Loneliness | Perceived discrimination | Health problems |
|  | (1) | (2) | (3) | (4) | (5) | (6) |
| Pain-suffering Y1 *(Ref.: A lot of pain – No suffering)* | |  |  |  |  |
| No pain – No suffering | -0.144* | -0.104 | -0.073 | -0.021 | -0.043 | -0.121*** |
|  | (0.062) | (0.057) | (0.044) | (0.077) | (0.035) | (0.027) |
| **No pain – A lot of suffering** | **-0.001** | **0.086** | **0.075** | **0.315*** | **0.013** | **-0.028** |
|  | **(0.082)** | **(0.065)** | **(0.046)** | **(0.128)** | **(0.043)** | **(0.028)** |
| A lot of pain – A lot of suffering | 0.167* | 0.164** | 0.143* | 0.305* | 0.057 | 0.156*** |
|  | (0.067) | (0.055) | (0.057) | (0.142) | (0.030) | (0.021) |
| Secure flourishing Y1 | -0.030*** | -0.082*** | -0.068*** | -0.361*** | 0.001 | -0.011*** |
|  | (0.007) | (0.008) | (0.006) | (0.016) | (0.007) | (0.002) |
| Threat life Y1 | 0.188*** | 0.024** | 0.022* | 0.053 | 0.019* | -0.001 |
|  | (0.028) | (0.008) | (0.010) | (0.033) | (0.008) | (0.004) |
| Depression symptoms Y1 | 0.041** | 0.209*** | 0.087*** | 0.211*** | 0.021 | -0.005 |
|  | (0.011) | (0.037) | (0.013) | (0.042) | (0.010) | (0.006) |
| Anxiety symptoms Y1 | 0.067*** | 0.085*** | 0.227*** | 0.162*** | 0.022 | 0.000 |
|  | (0.015) | (0.011) | (0.036) | (0.033) | (0.014) | (0.006) |
| Loneliness Y1 | 0.012*** | 0.012** | 0.011*** | 0.206*** | 0.013*** | -0.000 |
|  | (0.002) | (0.003) | (0.003) | (0.036) | (0.003) | (0.001) |
| Perceived discrimination Y1 | 0.055** | 0.010 | 0.024** | 0.076* | 0.272*** | 0.002 |
|  | (0.016) | (0.007) | (0.008) | (0.028) | (0.051) | (0.002) |
| Health problems Y1 | 0.143*** | 0.099*** | 0.101*** | 0.162* | 0.085*** | 0.373*** |
|  | (0.030) | (0.025) | (0.021) | (0.072) | (0.018) | (0.053) |
| Age Y1 | 0.001 | -0.003** | -0.004*** | -0.005 | -0.002*** | 0.001* |
|  | (0.001) | (0.001) | (0.001) | (0.003) | (0.001) | (0.000) |
| Gender *(Ref.: Male)* | |  |  |  |  |  |
| Female | 0.080*** | 0.038* | 0.071*** | -0.137** | 0.030* | -0.001 |
|  | (0.018) | (0.015) | (0.016) | (0.047) | (0.013) | (0.007) |
| Other | 0.026 | -0.117 | 0.309 | -0.648** | 0.552*** | 0.005 |
|  | (0.099) | (0.105) | (0.176) | (0.189) | (0.086) | (0.048) |
| Marital status Y1 *(Ref.: Married)* | |  |  |  |  |  |
| Separated | 0.105 | 0.026 | 0.024 | 0.784*** | 0.023 | 0.031 |
|  | (0.055) | (0.039) | (0.042) | (0.122) | (0.041) | (0.016) |
| Divorced | 0.024 | 0.016 | -0.006 | 0.461** | 0.016 | 0.027* |
|  | (0.024) | (0.020) | (0.026) | (0.124) | (0.020) | (0.010) |
| Widowed | -0.029 | 0.026 | -0.011 | 0.609*** | -0.087** | 0.014 |
|  | (0.028) | (0.027) | (0.029) | (0.088) | (0.024) | (0.011) |
| Single | -0.028 | 0.005 | 0.015 | 0.407*** | -0.011 | 0.008 |
|  | (0.019) | (0.017) | (0.016) | (0.067) | (0.019) | (0.008) |
| Domestic partner | -0.015 | 0.018 | 0.032 | 0.039 | -0.001 | 0.005 |
|  | (0.031) | (0.025) | (0.025) | (0.070) | (0.025) | (0.010) |
| Employment status Y1 *(Ref.: Employed for an employer)* | |  |  |  |  |  |
| Self-employed | -0.020 | 0.020 | 0.002 | -0.069 | 0.004 | 0.029*** |
|  | (0.026) | (0.016) | (0.019) | (0.071) | (0.026) | (0.007) |
| Retired | 0.030 | 0.032 | -0.026 | -0.209* | -0.019 | 0.059*** |
|  | (0.024) | (0.021) | (0.032) | (0.083) | (0.027) | (0.010) |
| Student | -0.038 | -0.022 | -0.018 | -0.081 | 0.016 | 0.032** |
|  | (0.041) | (0.032) | (0.036) | (0.103) | (0.029) | (0.011) |
| Homemaker | 0.023 | 0.074** | 0.048 | 0.014 | -0.009 | 0.038*** |
|  | (0.026) | (0.023) | (0.024) | (0.074) | (0.019) | (0.010) |
| Unemployed and looking | 0.021 | 0.121*** | 0.081** | 0.055 | 0.075** | 0.039** |
|  | (0.028) | (0.026) | (0.026) | (0.094) | (0.025) | (0.013) |
| Other/None | 0.012 | 0.029 | 0.025 | 0.100 | 0.008 | 0.099** |
|  | (0.042) | (0.035) | (0.026) | (0.072) | (0.029) | (0.028) |
| Level of education *(Ref.: Primary)* | |  |  |  |  |  |
| Secondary | -0.017 | -0.012 | -0.040 | -0.185* | -0.005 | -0.010 |
|  | (0.028) | (0.016) | (0.033) | (0.068) | (0.026) | (0.011) |
| Tertiary | -0.073 | -0.054* | -0.078 | -0.262* | -0.025 | -0.027* |
|  | (0.045) | (0.022) | (0.038) | (0.094) | (0.027) | (0.011) |
| Number of children Y1 | 0.004 | -0.004 | 0.003 | 0.023 | 0.001 | -0.003 |
|  | (0.004) | (0.006) | (0.003) | (0.017) | (0.004) | (0.001) |
| Constant | 1.484*** | 1.856*** | 1.899*** | 4.306*** | 1.226*** | 0.180** |
|  | (0.117) | (0.120) | (0.079) | (0.286) | (0.112) | (0.056) |
| *N* | 20944 | 20944 | 20944 | 20944 | 20944 | 20944 |
| adj. *R*2 | 0.291 | 0.382 | 0.362 | 0.328 | 0.192 | 0.416 |
| *Note:* * *p* < 0.05, ** *p* < 0.01, *** *p* < 0.001. Table shows unstandardized coefficients from Ordinary Least Squares Regressions with standard errors clustered at the country level in parentheses. | | | | | | |

**Table S.5:** Distribution of the pain-suffering variable across countries.

*Note:* First row has frequencies*,* and second row has column percentages*.*

|  | Argentina | Australia | Brazil | Egypt | Germany | India | Indonesia |
| --- | --- | --- | --- | --- | --- | --- | --- |
| No pain and suffering | 301 | 142 | 278 | 420 | 483 | 1491 | 336 |
|  | 60.20 | 51.45 | 50.09 | 40.54 | 60.83 | 62.94 | 75.85 |
| A lot of pain – no suffering | 18 | 6 | 41 | 155 | 25 | 135 | 29 |
|  | 3.60 | 2.17 | 7.39 | 14.96 | 3.15 | 5.70 | 6.55 |
| No pain - A lot of suffering | 33 | 6 | 31 | 27 | 49 | 188 | 9 |
|  | 6.60 | 2.17 | 5.59 | 2.61 | 6.17 | 7.94 | 2.03 |
| A lot of pain and suffering | 148 | 122 | 205 | 434 | 237 | 555 | 69 |
|  | 29.60 | 44.20 | 36.94 | 41.89 | 29.85 | 23.43 | 15.58 |
| Total | 500 | 276 | 555 | 1036 | 794 | 2369 | 443 |

|  | Israel | Mexico | Nigeria | Philippines | Poland | S. Africa | Spain |
| --- | --- | --- | --- | --- | --- | --- | --- |
| No pain and suffering | 779 | 295 | 309 | 43 | 2005 | 260 | 209 |
|  | 92.30 | 76.42 | 58.86 | 22.99 | 97.57 | 78.79 | 50.24 |
| A lot of pain – no suffering | 0 | 13 | 31 | 19 | 15 | 24 | 14 |
|  | 0.00 | 3.37 | 5.90 | 10.16 | 0.73 | 7.27 | 3.37 |
| No pain - A lot of suffering | 7 | 7 | 39 | 26 | 5 | 12 | 22 |
|  | 0.83 | 1.81 | 7.43 | 13.90 | 0.24 | 3.64 | 5.29 |
| A lot of pain and suffering | 58 | 71 | 146 | 99 | 30 | 34 | 171 |
|  | 6.87 | 18.39 | 27.81 | 52.94 | 1.46 | 10.30 | 41.11 |
| Total | 844 | 386 | 525 | 187 | 2055 | 330 | 416 |

|  | Tanzania | Turkey | United King | United States | Sweden | Hong Kong | China | Total |
| --- | --- | --- | --- | --- | --- | --- | --- | --- |
| No pain and suffering | 799 | 44 | 313 | 2284 | 1117 | 51 | 545 | 14576 |
|  | 69.00 | 39.29 | 54.06 | 64.94 | 77.89 | 68.00 | 93.64 | 69.60 |
| A lot of pain – no suffering | 51 | 3 | 17 | 97 | 25 | 0 | 1 | 797 |
|  | 4.40 | 2.68 | 2.94 | 2.76 | 1.74 | 0.00 | 0.17 | 3.81 |
| No pain - A lot of suffering | 78 | 14 | 17 | 38 | 30 | 3 | 6 | 819 |
|  | 6.74 | 12.50 | 2.94 | 1.08 | 2.09 | 4.00 | 1.03 | 3.91 |
| A lot of pain and suffering | 230 | 51 | 232 | 1098 | 262 | 21 | 30 | 4752 |
|  | 19.86 | 45.54 | 40.07 | 31.22 | 18.27 | 28.00 | 5.15 | 22.69 |
| Total | 1158 | 112 | 579 | 3517 | 1434 | 75 | 582 | 20944 |

**Table S.6:** Continuous Variables by Pain Category and Retention Status. * *p* < 0.05, ** *p* < 0.01, *** *p* < 0.001.

| **Pain-suffering Y1** | **Variable** | **t-test p_value** | **Dropped -mean (std. dev)** | **Retained -mean (std. dev)** |
| --- | --- | --- | --- | --- |
| None None | Age Y1 | ******* | 38.41 (15.09) | 45.1 (17.46) |
| A lot None | Age Y1 | ****** | 41.15 (16.35) | 43.4 (16.74) |
| None A lot | Age Y1 | ***** | 38.3 (15.18) | 39.86 (14.78) |
| A lot A lot | Age Y1 | ******* | 43.64 (16.7) | 49.42 (16.6) |
| None None | Relationship cont. Y1 | 0.422 | 8.47 (2.15) | 8.49 (1.9) |
| A lot None | Relationship cont. Y1 | 0.082 | 7.76 (3) | 8.01 (2.79) |
| None A lot | Relationship cont. Y1 | 0.09 | 7.03 (3.4) | 6.74 (3.5) |
| A lot A lot | Relationship cont. Y1 | ******* | 6.79 (3.34) | 6.48 (3.27) |
| None None | Depression symptoms Y1 | ******* | 1.31 (0.68) | 1.23 (0.59) |
| A lot None | Depression symptoms Y1 | ***** | 1.98 (1.13) | 1.86 (1.06) |
| None A lot | Depression symptoms Y1 | ***** | 2.35 (1.23) | 2.49 (1.2) |
| A lot A lot | Depression symptoms Y1 | ******* | 2.96 (1.12) | 2.8 (1.11) |
| None None | Perceived discrimination Y1 | ******* | 3.41 (0.9) | 3.48 (0.8) |
| A lot None | Perceived discrimination Y1 | 0.605 | 3.02 (1.1) | 3.05 (1.08) |
| None A lot | Perceived discrimination Y1 | 0.382 | 2.94 (1.12) | 2.99 (1.09) |
| A lot A lot | Perceived discrimination Y1 | ******* | 2.6 (1.14) | 2.75 (1.06) |
| None None | Financial security Y1 | ******* | 6.36 (3.48) | 7.27 (3.08) |
| A lot None | Financial security Y1 | 0.065 | 4.86 (3.94) | 5.22 (3.89) |
| None A lot | Financial security Y1 | 0.22 | 4.44 (4.07) | 4.19 (3.98) |
| A lot A lot | Financial security Y1 | 0.911 | 3.85 (3.98) | 3.86 (3.74) |
| None None | Anxiety symptoms Y1 | ******* | 1.39 (0.73) | 1.3 (0.63) |
| A lot None | Anxiety symptoms Y1 | 0.065 | 2.11 (1.11) | 2 (1.1) |
| None A lot | Anxiety symptoms Y1 | 0.563 | 2.3 (1.21) | 2.34 (1.2) |
| A lot A lot | Anxiety symptoms Y1 | ******* | 3.01 (1.11) | 2.8 (1.13) |
| None None | Flourishing_Y1 | 0.905 | 8.31 (1.48) | 8.31 (1.28) |
| A lot None | Flourishing_Y1 | 0.272 | 7.47 (1.96) | 7.57 (1.73) |
| None A lot | Flourishing_Y1 | ******* | 6.98 (2.23) | 6.57 (2.33) |
| A lot A lot | Flourishing_Y1 | ******* | 6.27 (2.29) | 5.97 (2.17) |
| None None | Delayed gratif. Y1 | ******* | 7.73 (2.72) | 7.51 (2.58) |
| A lot None | Delayed gratif. Y1 | 0.974 | 7.32 (3.13) | 7.33 (3.04) |
| None A lot | Delayed gratif. Y1 | ****** | 7.35 (3.16) | 6.93 (3.32) |
| A lot A lot | Delayed gratif. Y1 | ******* | 7.09 (3.1) | 6.81 (2.99) |
| None None | Happiness Y1 | ******* | 8 (2.31) | 8.13 (1.97) |
| A lot None | Happiness Y1 | 0.53 | 6.72 (3.29) | 6.82 (3.1) |
| None A lot | Happiness Y1 | ******* | 6.21 (3.39) | 5.58 (3.43) |
| A lot A lot | Happiness Y1 | ******* | 5.5 (3.38) | 5.18 (3.08) |
| None None | Purpose Y1 | ******* | 8.46 (2.22) | 8.36 (2.07) |
| A lot None | Purpose Y1 | 0.603 | 7.77 (2.87) | 7.85 (2.83) |
| None A lot | Purpose Y1 | ******* | 7.46 (3.17) | 6.92 (3.51) |
| A lot A lot | Purpose Y1 | ******* | 6.85 (3.33) | 6.48 (3.32) |
| None None | Life satisfaction Y1 | ****** | 7.98 (2.41) | 8.07 (2.14) |
| A lot None | Life satisfaction Y1 | 0.916 | 7.05 (3.24) | 7.07 (3.16) |
| None A lot | Life satisfaction Y1 | ****** | 5.86 (3.56) | 5.31 (3.57) |
| A lot A lot | Life satisfaction Y1 | ******* | 5.42 (3.51) | 4.98 (3.3) |
| None None | Loneliness Y1 | ******* | 2.18 (2.89) | 1.85 (2.59) |
| A lot None | Loneliness Y1 | 0.07 | 3.62 (3.79) | 3.28 (3.67) |
| None A lot | Loneliness Y1 | 0.507 | 4.66 (4.07) | 4.79 (3.97) |
| A lot A lot | Loneliness Y1 | 0.623 | 5.28 (3.87) | 5.24 (3.7) |
| None None | Mental health Y1 | ******* | 8.84 (1.88) | 8.97 (1.55) |
| A lot None | Mental health Y1 | 0.054 | 7.94 (2.85) | 8.21 (2.64) |
| None A lot | Mental health Y1 | ****** | 7.26 (3.26) | 6.79 (3.46) |
| A lot A lot | Mental health Y1 | 0.436 | 5.88 (3.57) | 5.83 (3.37) |
| None None | Number of children Y1 | ******* | 1.26 (2.1) | 1.02 (1.46) |
| A lot None | Number of children Y1 | 0.547 | 1.59 (1.83) | 1.54 (1.91) |
| None A lot | Number of children Y1 | 0.085 | 1.24 (1.56) | 1.46 (3.57) |
| A lot A lot | Number of children Y1 | ******* | 1.32 (2.36) | 1.04 (2.15) |
| None None | Physical health Y1 | 0.908 | 8.54 (1.98) | 8.54 (1.75) |
| A lot None | Physical health Y1 | 0.557 | 6.82 (3.26) | 6.73 (2.94) |
| None A lot | Physical health Y1 | ****** | 7.54 (2.98) | 7.12 (2.98) |
| A lot A lot | Physical health Y1 | ******* | 5.01 (3.48) | 4.41 (3.16) |
| None None | Orien. promote good Y1 | ***** | 8.53 (2) | 8.48 (1.76) |
| A lot None | Orien. promote good | 0.299 | 8.07 (2.72) | 8.2 (2.44) |
| None A lot | Orien. promote good | 0.08 | 7.87 (2.79) | 7.62 (2.98) |
| A lot A lot | Orien. promote good | ******* | 7.79 (2.68) | 7.58 (2.63) |
| None None | Relationship sat. Y1 | 0.206 | 8.3 (2.25) | 8.26 (2.02) |
| A lot None | Relationship sat. Y1 | 0.617 | 7.71 (2.94) | 7.64 (2.98) |
| None A lot | Relationship sat. Y1 | 0.161 | 6.78 (3.51) | 6.54 (3.59) |
| A lot A lot | Relationship sat. Y1 | ******* | 6.42 (3.47) | 6.02 (3.42) |
| None None | Secure Flourishing Y1 | ******* | 8 (1.45) | 8.15 (1.28) |
| A lot None | Secure Flourishing Y1 | 0.061 | 7.05 (1.86) | 7.22 (1.69) |
| None A lot | Secure Flourishing Y1 | ******* | 6.56 (2.08) | 6.19 (2.16) |
| A lot A lot | Secure Flourishing Y1 | ******* | 5.88 (2.24) | 5.65 (2.07) |
| None None | Threat life Y1 | ******* | 3.53 (0.85) | 3.62 (0.76) |
| A lot None | Threat life Y1 | 0.858 | 2.52 (1.26) | 2.53 (1.27) |
| None A lot | Threat life Y1 | 0.858 | 2.71 (1.25) | 2.72 (1.24) |
| A lot A lot | Threat life Y1 | ******* | 1.81 (1.04) | 2.02 (1.09) |
| None None | Material security Y1 | ******* | 6.53 (3.58) | 7.45 (3.13) |
| A lot None | Material security Y1 | ****** | 5.12 (3.99) | 5.69 (4) |
| None A lot | Material security Y1 | 0.535 | 4.5 (4.1) | 4.38 (4.05) |
| A lot A lot | Material security Y1 | 0.077 | 4.1 (3.99) | 4.24 (3.76) |
| None None | Meaning Y1 | 0.113 | 8.22 (2.3) | 8.27 (2.04) |
| A lot None | Meaning Y1 | 0.076 | 7.3 (3.11) | 7.57 (2.94) |
| None A lot | Meaning Y1 | ***** | 6.57 (3.39) | 6.19 (3.42) |
| A lot A lot | Meaning Y1 | ******* | 6.2 (3.36) | 5.89 (3.26) |

**Table S.7:** Categorical Variables by Pain Category and Retention Status. * *p* < 0.05, ** *p* < 0.01, *** *p* < 0.001.

**Explanation of % (health problems below as an example)**

42.5% means that among all people who had pain+suffering = "A lot A lot" and were retained at wave 2, 42.5% had Health problems Y1 = "Yes".

31.7% means that among the "A lot A lot" group who dropped out, 31.7% had Health problems Y1 = "Yes".

| **Pain-suffering Y1** | **Variable category** | **Chi-Sq p_value** | **Dropped – N (%)** | **Retained – N (%)** |
| --- | --- | --- | --- | --- |
| None None | Level of education Y1 - Primary | ******* | 2303 (22.5%) | 2500 (15.3%) |
| A lot None | Level of education Y1 - Primary | ******* | 332 (44.6%) | 333 (37.7%) |
| None A lot | Level of education Y1 - Primary | ****** | 246 (31.9%) | 280 (30.6%) |
| A lot A lot | Level of education Y1 - Primary | ******* | 1410 (33.6%) | 1400 (26.3%) |
| None None | Level of education Y1 - Secondary | ******* | 5910 (57.8%) | 8745 (53.7%) |
| A lot None | Level of education Y1 - Secondary | ******* | 349 (46.8%) | 427 (48.4%) |
| None A lot | Level of education Y1 - Secondary | ****** | 439 (56.9%) | 474 (51.9%) |
| A lot A lot | Level of education Y1 - Secondary | ******* | 2282 (54.3%) | 2907 (54.6%) |
| None None | Level of education Y1 - Tertiary | ******* | 1996 (19.5%) | 5034 (30.9%) |
| A lot None | Level of education Y1 - Tertiary | ******* | 63 (8.5%) | 123 (13.9%) |
| None A lot | Level of education Y1 - Tertiary | ****** | 86 (11.1%) | 159 (17.4%) |
| A lot A lot | Level of education Y1 - Tertiary | ******* | 504 (12.0%) | 1006 (18.9%) |
| None None | Employment status Y1 - Employed for an employer | ******* | 3611 (35.3%) | 6722 (41.3%) |
| A lot None | Employment status Y1 - Employed for an employer | ****** | 174 (23.4%) | 210 (23.8%) |
| None A lot | Employment status Y1 - Employed for an employer | 0.089 | 198 (25.6%) | 241 (26.4%) |
| A lot A lot | Employment status Y1 - Employed for an employer | ******* | 1075 (25.6%) | 1173 (22.0%) |
| None None | Employment status Y1 - Self-employed | ******* | 2189 (21.4%) | 2826 (17.3%) |
| A lot None | Employment status Y1 - Self-employed | ****** | 164 (22.0%) | 173 (19.6%) |
| None A lot | Employment status Y1 - Self-employed | 0.089 | 164 (21.2%) | 234 (25.6%) |
| A lot A lot | Employment status Y1 - Self-employed | ******* | 737 (17.5%) | 864 (16.2%) |
| None None | Employment status Y1 - Retired | ******* | 595 (5.8%) | 2476 (15.2%) |
| A lot None | Employment status Y1 - Retired | ****** | 56 (7.5%) | 123 (13.9%) |
| None A lot | Employment status Y1 - Retired | 0.089 | 44 (5.7%) | 65 (7.1%) |
| A lot A lot | Employment status Y1 - Retired | ******* | 517 (12.3%) | 1222 (23.0%) |
| None None | Employment status Y1 - Student | ******* | 757 (7.4%) | 967 (5.9%) |
| A lot None | Employment status Y1 - Student | ****** | 33 (4.4%) | 30 (3.4%) |
| None A lot | Employment status Y1 - Student | 0.089 | 48 (6.2%) | 51 (5.6%) |
| A lot A lot | Employment status Y1 - Student | ******* | 181 (4.3%) | 145 (2.7%) |
| None None | Employment status Y1 - Homemaker | ******* | 1555 (15.2%) | 1582 (9.7%) |
| A lot None | Employment status Y1 - Homemaker | ****** | 218 (29.3%) | 224 (25.4%) |
| None A lot | Employment status Y1 - Homemaker | 0.089 | 154 (19.9%) | 137 (15.0%) |
| A lot A lot | Employment status Y1 - Homemaker | ******* | 823 (19.6%) | 904 (17.0%) |
| None None | Employment status Y1 - Unemployed and looking for a job | ******* | 1063 (10.4%) | 1080 (6.6%) |
| A lot None | Employment status Y1 - Unemployed and looking for a job | ****** | 72 (9.7%) | 96 (10.9%) |
| None A lot | Employment status Y1 - Unemployed and looking for a job | 0.089 | 120 (15.5%) | 140 (15.3%) |
| A lot A lot | Employment status Y1 - Unemployed and looking for a job | ******* | 529 (12.6%) | 550 (10.3%) |
| None None | Employment status Y1 - None of these/other | ******* | 373 (3.7%) | 561 (3.4%) |
| A lot None | Employment status Y1 - None of these/other | ****** | 24 (3.2%) | 23 (2.6%) |
| None A lot | Employment status Y1 - None of these/other | 0.089 | 37 (4.8%) | 44 (4.8%) |
| A lot A lot | Employment status Y1 - None of these/other | ******* | 300 (7.1%) | 448 (8.4%) |
| None None | Gender - Male | ******* | 4959 (48.5%) | 8655 (53.1%) |
| A lot None | Gender - Male | 0.863 | 297 (39.9%) | 364 (41.2%) |
| None A lot | Gender - Male | 0.371 | 378 (49.0%) | 479 (52.4%) |
| A lot A lot | Gender - Male | 0.231 | 1631 (38.8%) | 2158 (40.6%) |
| None None | Gender - Female` | ******* | 5223 (51.1%) | 7612 (46.7%) |
| A lot None | Gender - Female | 0.863 | 446 (59.9%) | 518 (58.7%) |
| None A lot | Gender - Female | 0.371 | 392 (50.8%) | 433 (47.4%) |
| A lot A lot | Gender - Female | 0.231 | 2547 (60.6%) | 3138 (59.0%) |
| None None | Gender - Other | ******* | 6 (0.1%) | 8 (0.0%) |
| A lot None | Gender - Other | 0.863 | 1 (0.1%) | 1 (0.1%) |
| None A lot | Gender - Other | 0.371 | 1 (0.1%) | 1 (0.1%) |
| A lot A lot | Gender - Other | 0.231 | 12 (0.3%) | 17 (0.3%) |
| None None | Health problems Y1 - No | ******* | 581 (5.7%) | 654 (4.0%) |
| A lot None | Health problems Y1 - No | 0.651 | 234 (31.4%) | 268 (30.4%) |
| None A lot | Health problems Y1 - No | 0.51 | 156 (20.2%) | 199 (21.8%) |
| A lot A lot | Health problems Y1 - No | ******* | 2337 (55.6%) | 3604 (67.7%) |
| None None | Health problems Y1 - Yes | ******* | 9500 (93.0%) | 15571 (95.6%) |
| A lot None | Health problems Y1 -Yes | 0.651 | 506 (67.9%) | 612 (69.3%) |
| None A lot | Health problems Y1 -Yes | 0.51 | 606 (78.5%) | 709 (77.6%) |
| A lot A lot | Health problems Y1 -Yes | ******* | 1787 (42.5%) | 1688 (31.7%) |
| None None | Marital status Y1 - Married | ******* | 3006 (29.4%) | 3715 (22.8%) |
| A lot None | Marital status Y1 - Married | ****** | 163 (21.9%) | 176 (19.9%) |
| None A lot | Marital status Y1 - Married | 0.091 | 248 (32.1%) | 271 (29.6%) |
| A lot A lot | Marital status Y1 - Married | ******* | 1007 (24.0%) | 1109 (20.8%) |
| None None | Marital status Y1 - Separated | ******* | 5517 (54.0%) | 9996 (61.4%) |
| A lot None | Marital status Y1 - Separated | ****** | 442 (59.3%) | 562 (63.6%) |
| None A lot | Marital status Y1 - Separated | 0.091 | 390 (50.5%) | 491 (53.7%) |
| A lot A lot | Marital status Y1 - Separated | ******* | 2034 (48.4%) | 2769 (52.0%) |
| None None | Marital status Y1 - Divorced | ******* | 185 (1.8%) | 223 (1.4%) |
| A lot None | Marital status Y1 - Divorced | ****** | 17 (2.3%) | 19 (2.2%) |
| None A lot | Marital status Y1 - Divorced | 0.091 | 25 (3.2%) | 37 (4.0%) |
| A lot A lot | Marital status Y1 - Divorced | ******* | 177 (4.2%) | 215 (4.0%) |
| None None | Marital status Y1 - Widowed | ******* | 326 (3.2%) | 677 (4.2%) |
| A lot None | Marital status Y1 - Widowed | ****** | 17 (2.3%) | 39 (4.4%) |
| None A lot | Marital status Y1 - Widowed | 0.091 | 21 (2.7%) | 41 (4.5%) |
| A lot A lot | Marital status Y1 - Widowed | ******* | 281 (6.7%) | 501 (9.4%) |
| None None | Marital status Y1 - Single | ******* | 260 (2.5%) | 560 (3.4%) |
| A lot None | Marital status Y1 - Single | ****** | 50 (6.7%) | 52 (5.9%) |
| None A lot | Marital status Y1 - Single | 0.091 | 26 (3.4%) | 28 (3.1%) |
| A lot A lot | Marital status Y1 - Single | ******* | 287 (6.8%) | 395 (7.4%) |
| None None | Marital status Y1 - Domestic partner | ******* | 748 (7.3%) | 904 (5.5%) |
| A lot None | Marital status Y1 - Domestic partner | ****** | 51 (6.8%) | 33 (3.7%) |
| None A lot | Marital status Y1 - Domestic partner | 0.091 | 52 (6.7%) | 42 (4.6%) |
| A lot A lot | Marital status Y1 - Domestic partner | ******* | 345 (8.2%) | 298 (5.6%) |
